# Supplementary material for: Psychological stress, cognitive decline and the development of dementia in amnestic mild cognitive impairment
Source: PubMed Central journal article supplement (PMC7046646; doi:10.1038/s41598-020-60607-0), 2020-02-27
Supplement: 41598_2020_60607_MOESM1_ESM.pdf [file 41598_2020_60607_MOESM1_ESM.pdf]

# **Psychological stress, cognitive decline and the development of dementia in amnestic mild cognitive impairment**

**Rebecca Sussams<sup>1, 2</sup>, Wolff Schlotz<sup>3</sup>, Zoe Clough<sup>1,2</sup>, Jay Amin<sup>1, 2</sup>, Sharon Simpson<sup>4</sup>, Amelia Abbott<sup>1, 2</sup>, Rebecca Beardmore<sup>1, 2</sup>, Richard Sharples<sup>2</sup>, Rachel Raybould<sup>5</sup>, Keeley Brookes<sup>6</sup>, Kevin Morgan<sup>6</sup>, David Culliford<sup>7</sup>, Clive Holmes<sup>1, 2\*</sup>**

Supplemental Table 1. Between- and within-subject effects of stress and covariates on S1 cortisol measures (immediately after awakening, Box-Cox transformed – original in units of nmol/L). Group interactions represent differences between comparison and aMCI group.

| Variable         | Model 1    |               |      |              |               |      | Model 2    |               |        |              |               |        |
|------------------|------------|---------------|------|--------------|---------------|------|------------|---------------|--------|--------------|---------------|--------|
|                  | Univariate |               |      | Multivariate |               |      | Univariate |               |        | Multivariate |               |        |
|                  | B          | 95% CI        | P    | B            | 95% CI        | P    | B          | 95% CI        | P      | B            | 95% CI        | P      |
| Within-subjects  |            |               |      |              |               |      |            |               |        |              |               |        |
| PSS              | 0.0001     | -0.01,0.01    | .99  | -0.003       | -0.015,0.009  | .61  | -0.007     | -0.026,0.011  | .44    | -0.005       | -0.025,0.015  | .64    |
| RLCQ             | 0.0004     | -0.0001,0.001 | .13  | 0.001        | -0.0001,0.001 | .12  | -0.0004    | -0.001,0.0004 | .37    | -0.0003      | -0.001,0.001  | .52    |
| Group x PSS      |            |               |      |              |               |      | 0.012      | -0.012,0.037  | .31    | 0.007        | -0.019,0.032  | .61    |
| Group x RLCQ     |            |               |      |              |               |      | 0.002      | 0.0004,0.003  | .007   | 0.002        | 0.000,0.003   | .017   |
| Between-subjects |            |               |      |              |               |      |            |               |        |              |               |        |
| PSS              | 0.016      | 0.003,0.028   | .013 | 0.018        | 0.005,0.031   | .007 | 0.002      | -0.017,0.020  | .87    | -0.003       | -0.023,0.018  | .81    |
| RLCQ             | 0.0002     | -0.001,0.001  | .62  | -0.0002      | -0.001,0.001  | .61  | 0.0002     | -0.001,0.002  | .76    | 0.001        | -0.001,0.002  | .71    |
| Group x PSS      |            |               |      |              |               |      | 0.022      | -0.003,0.047  | .084   | 0.025        | -0.003,0.051  | .077   |
| Group x RLCQ     |            |               |      |              |               |      | 0.0002     | -0.002,0.002  | .84    | -0.001       | -0.003,0.001  | .49    |
| Age (years)      | -0.003     | -0.01,0.01    | .47  | -0.006       | -0.014,0.003  | .17  | 0.009      | -0.003,0.022  | .16    | 0.010        | -0.002,0.023  | .11    |
| Gender (Female)  | -0.15      | -0.30,0.001   | .052 | -0.179       | -0.329,-0.028 | .020 | -0.148     | -0.409,0.114  | .27    | -0.144       | -0.284,0.097  | .24    |
| Group x age      |            |               |      |              |               |      | -0.034     | -0.052,-0.017 | < .001 | -0.035       | -0.053,-0.017 | < .001 |
| Group x gender   |            |               |      |              |               |      | 0.044      | -0.286,0.374  | .80    | -0.001       | -0.309,0.308  | .99    |

Supplemental Table 2. Between- and within-subject effects of stress and covariates on CAR measures (increase after awakening, Box-Cox transformed – original in units of nmol/L). Group interactions represent differences between comparison and aMCI group.

| Variable         | Model 1    |               |      |              |               |      | Model 2    |                |      |              |               |      |
|------------------|------------|---------------|------|--------------|---------------|------|------------|----------------|------|--------------|---------------|------|
|                  | Univariate |               |      | Multivariate |               |      | Univariate |                |      | Multivariate |               |      |
|                  | B          | 95% CI        | P    | B            | 95% CI        | P    | B          | 95% CI         | P    | B            | 95% CI        | P    |
| Within-subjects  |            |               |      |              |               |      |            |                |      |              |               |      |
| PSS              | 0.001      | -0.007,0.018  | .36  | 0.008        | -0.005,0.020  | .21  | 0.009      | -0.010,0.028   | .34  | 0.005        | -0.015,0.026  | .61  |
| RLCQ             | -0.0001    | -0.001,0.0004 | .67  | -0.0002      | -0.001,0.0004 | .57  | 0.001      | -0.0003,0.001  | .18  | 0.0005       | -0.0004,0.001 | .27  |
| Group x PSS      |            |               |      |              |               |      | -0.006     | -0.031,0.018   | .61  | 0.001        | -0.025,0.027  | .96  |
| Group x RLCQ     |            |               |      |              |               |      | -0.001     | -0.002,-0.0002 | .023 | -0.001       | -0.002,-0.000 | .045 |
| Between-subjects |            |               |      |              |               |      |            |                |      |              |               |      |
| PSS              | -0.015     | -0.026,-0.005 | .004 | -0.017       | -0.027,-0.006 | .002 | -0.011     | -0.026,0.005   | .18  | -0.010       | -0.028,0.008  | .27  |
| RLCQ             | -0.001     | -0.001,0.0001 | .099 | -0.0002      | -0.001,0.001  | .68  | -0.001     | -0.002,0.001   | .38  | -0.0002      | -0.001,0.001  | .77  |
| Group x PSS      |            |               |      |              |               |      | -0.006     | -0.027,0.015   | .58  | -0.006       | -0.028,0.017  | .63  |
| Group x RLCQ     |            |               |      |              |               |      | -0.0004    | -0.002,0.001   | .58  | -0.0003      | -0.002,0.001  | .69  |
| Age (years)      | 0.002      | -0.005,0.009  | .61  | 0.004        | -0.003,0.011  | .24  | -0.002     | -0.013,0.009   | .68  | -0.002       | -0.013,0.008  | .68  |
| Gender (Female)  | 0.172      | 0.045,0.299   | .008 | 0.185        | 0.061,0.309   | .004 | 0.239      | 0.021,0.457    | .031 | 0.248        | 0.046,0.450   | .016 |
| Group x age      |            |               |      |              |               |      | 0.017      | 0.001,0.032    | .033 | 0.017        | 0.002,0.032   | .031 |
| Group x gender   |            |               |      |              |               |      | -0.142     | -0.418,0.134   | .31  | -0.150       | -0.412,0.112  | .26  |

Supplemental Table 3. Between- and within-subject effects of stress and covariates on AUC measures (diurnal cortisol area under the curve, Box-Cox transformed – original in units of nmol/L). Group interactions represent differences between comparison and aMCI group.

| Variable         | Model 1    |              |      |              |              |      | Model 2    |              |      |              |              |      |
|------------------|------------|--------------|------|--------------|--------------|------|------------|--------------|------|--------------|--------------|------|
|                  | Univariate |              |      | Multivariate |              |      | Univariate |              |      | Multivariate |              |      |
|                  | B          | 95% CI       | P    | B            | 95% CI       | P    | B          | 95% CI       | P    | B            | 95% CI       | P    |
| Within-subjects  |            |              |      |              |              |      |            |              |      |              |              |      |
| PSS              | -0.354     | -1.61,0.91   | .58  | -0.587       | -1.89,0.72   | .38  | -0.27      | -2.20,1.66   | .78  | 0.38         | -1.73,2.49   | .73  |
| RLCQ             | 0.035      | -0.025,0.095 | .25  | 0.042        | -0.019,0.103 | .18  | -0.07      | -0.15,0.02   | .12  | -0.08        | -0.17,0.02   | .11  |
| Group x PSS      |            |              |      |              |              |      | -0.15      | -2.71,2.40   | .91  | -0.96        | -3.66,1.73   | .49  |
| Group x RLCQ     |            |              |      |              |              |      | 0.20       | 0.08,0.32    | .001 | 0.21         | 0.09,0.34    | .001 |
| Between-subjects |            |              |      |              |              |      |            |              |      |              |              |      |
| PSS              | 1.40       | 0.19,2.60    | .023 | 1.40         | 0.16,2.64    | .026 | 0.31       | -1.49,2.10   | .74  | 0.25         | -1.77,2.28   | .81  |
| RLCQ             | -0.005     | -0.09,0.08   | .91  | -0.02        | -0.11,0.07   | .62  | -0.009     | -0.131,0.114 | .89  | 0.006        | -0.135,0.147 | .93  |
| Group x PSS      |            |              |      |              |              |      | 1.53       | -0.90,3.96   | .22  | 1.30         | -1.33,3.92   | .33  |
| Group x RLCQ     |            |              |      |              |              |      | 0.026      | -0.143,0.194 | .77  | -0.006       | -0.186,0.174 | .95  |
| Age (years)      | 0.62       | -0.21,1.45   | .14  | 0.40         | -0.43,1.23   | .35  | 1.18       | -0.08,2.43   | .066 | 1.14         | -0.12,2.39   | .075 |
| Gender (Female)  | -8.75      | -23.67,6.17  | .25  | -9.56        | -24.15,5.02  | .20  | -18.63     | -43.78,6.53  | .15  | -17.55       | -41.25,6.15  | .15  |
| Group x age      |            |              |      |              |              |      | -2.06      | -3.88,-0.23  | .027 | -1.77        | -3.60,0.07   | .059 |
| Group x gender   |            |              |      |              |              |      | 25.08      | -6.93,57.10  | .13  | 18.01        | -12.59,48.61 | .25  |
